# Supplementary figures and images for: Periodic changes of cyclin D1 mRNA stability are regulated by PC4 modifications in the cell cycle
Source: PubMed Central journal article supplement — J Cell Biol. 2024 Feb 13;223(3):e202308066. doi: 10.1083/jcb.202308066 (PMC10864110; doi:10.1083/jcb.202308066), 2024-02-13

# Figure 1

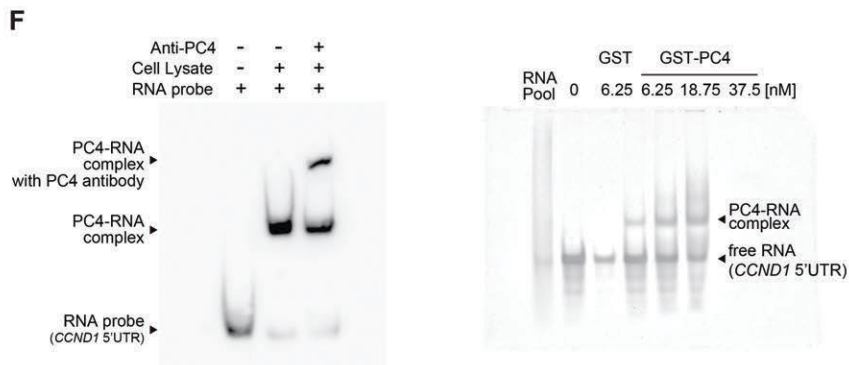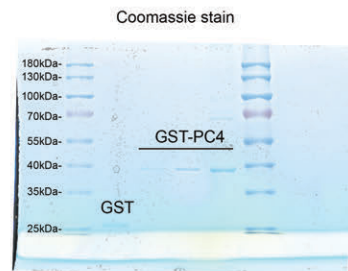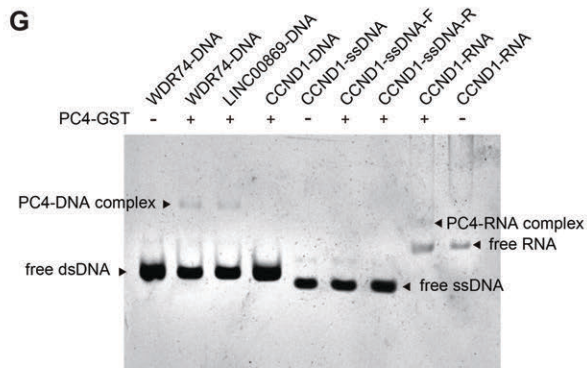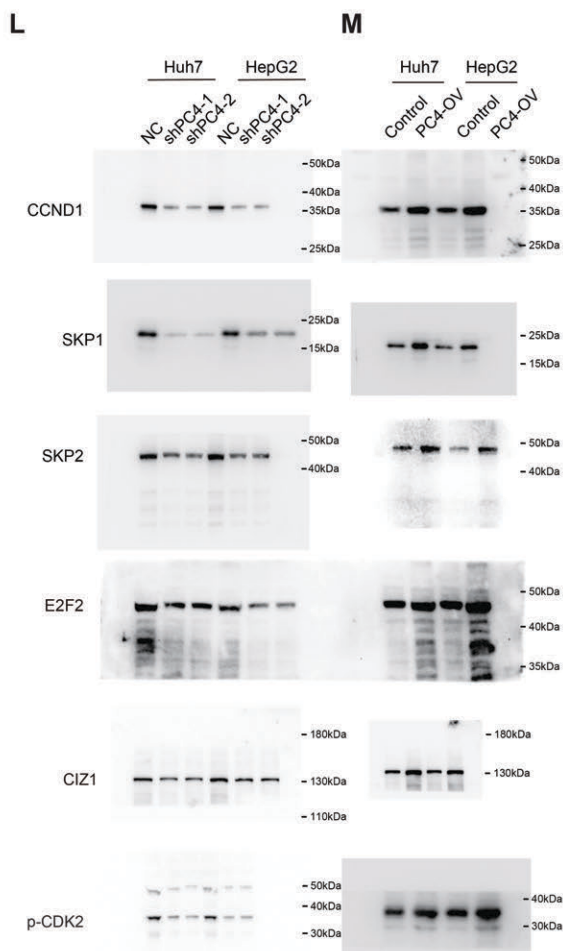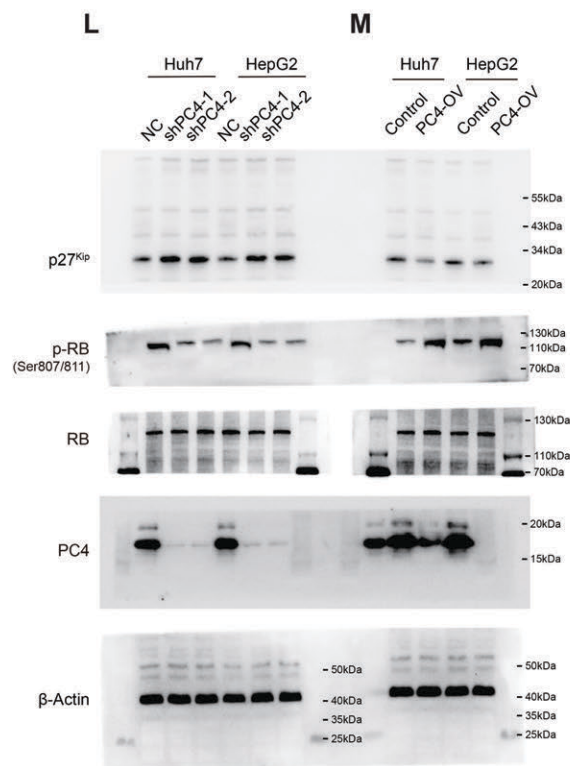

Supplement: JCB_202308066_SourceDataF1.pdf [file JCB_202308066_SourceDataF1.pdf]

# Figure 2

**B**

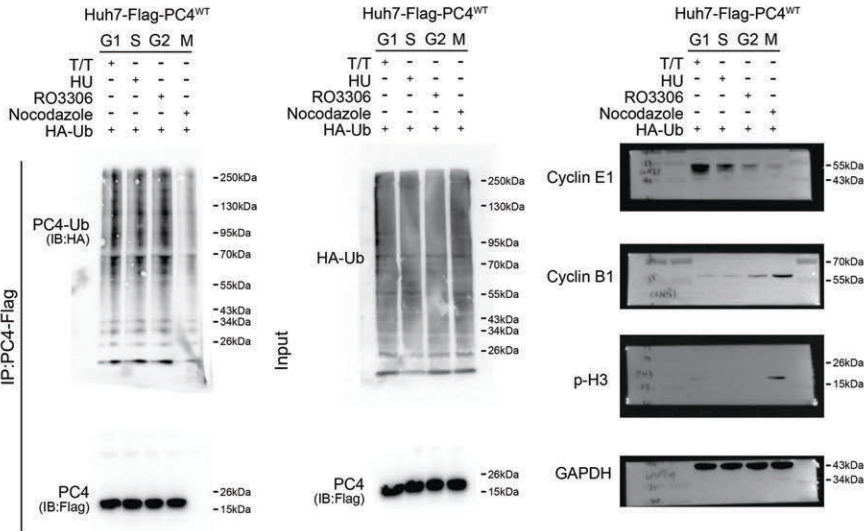

**D**

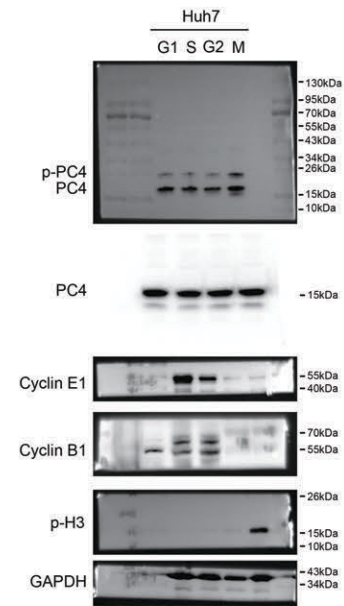

**C**

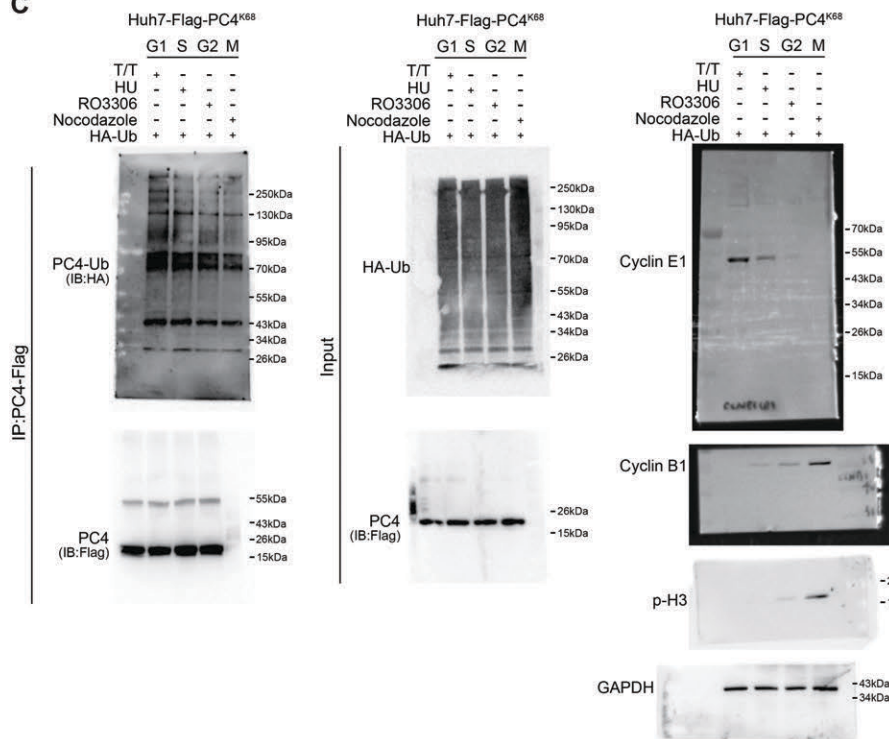

**E**

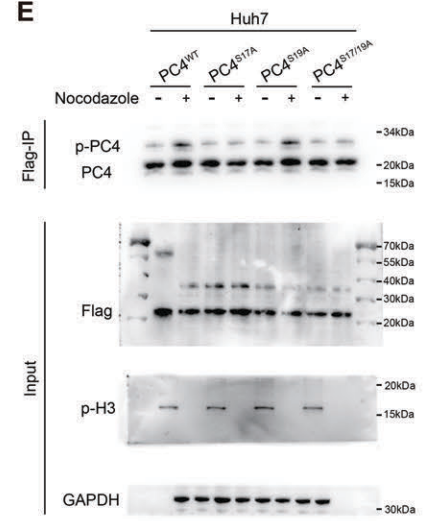

**I**

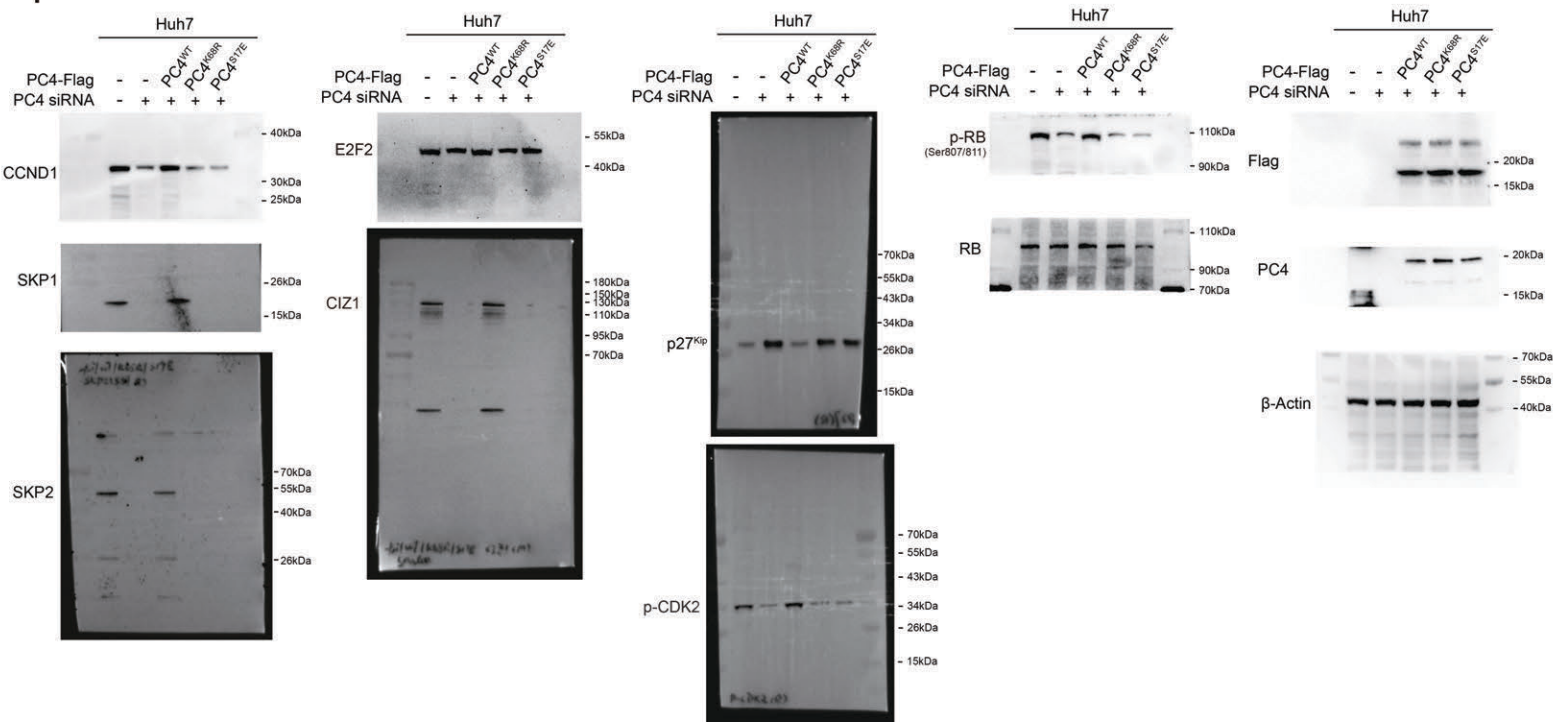

Supplement: JCB_202308066_SourceDataF2.pdf [file JCB_202308066_SourceDataF2.pdf]

**Figure 3**

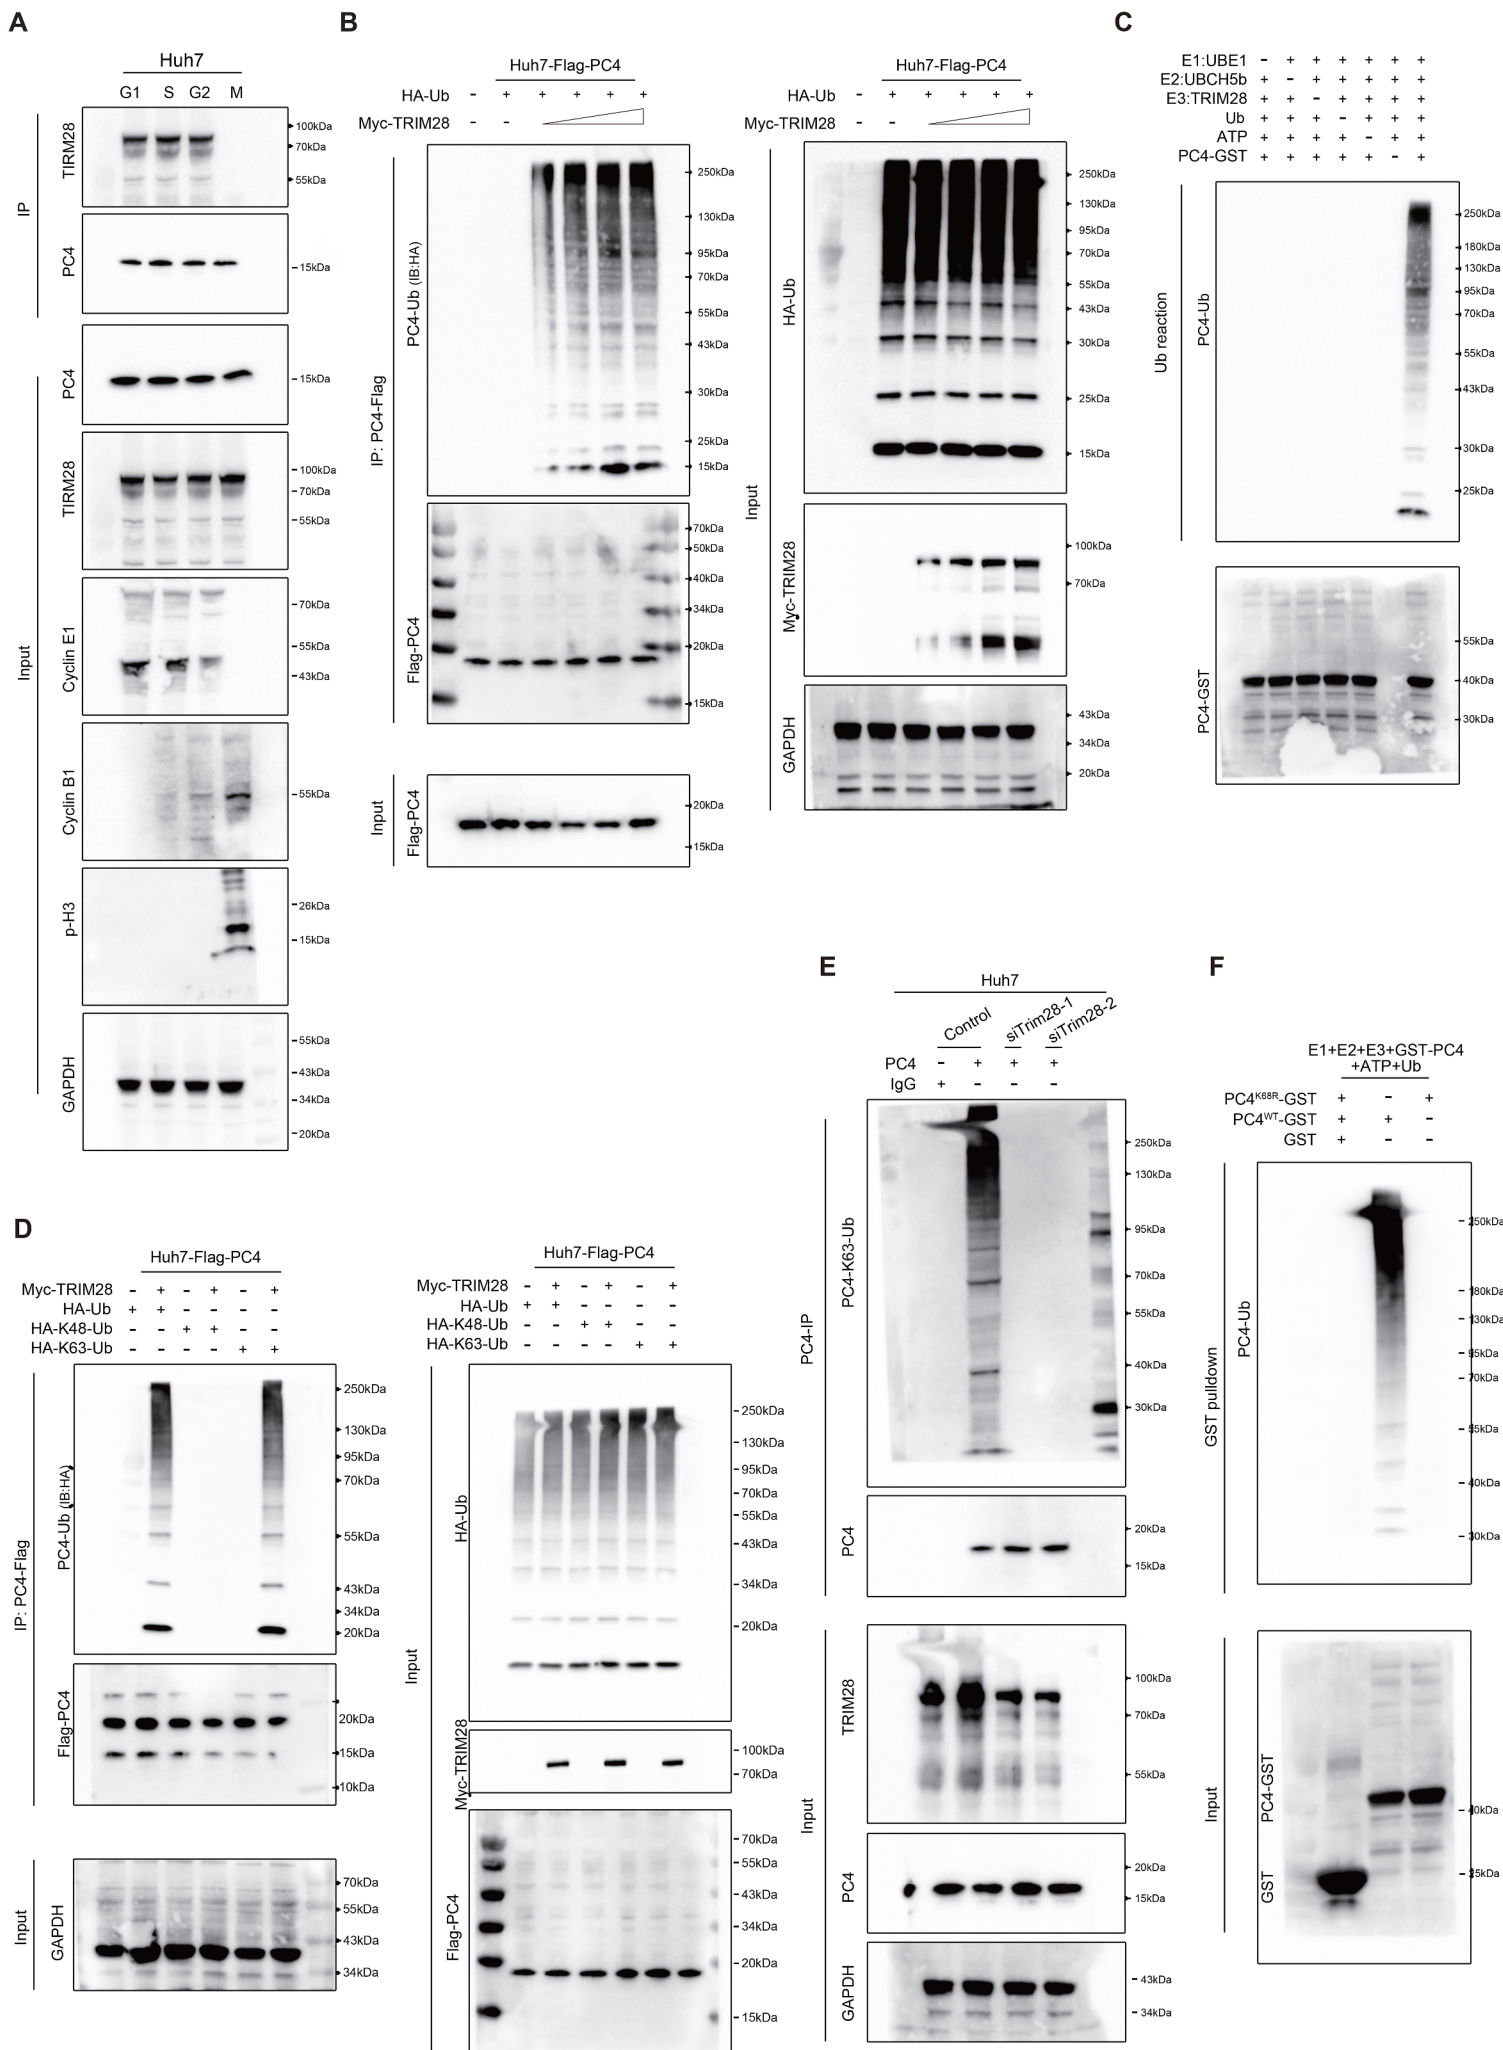

# Figure 3

**G**

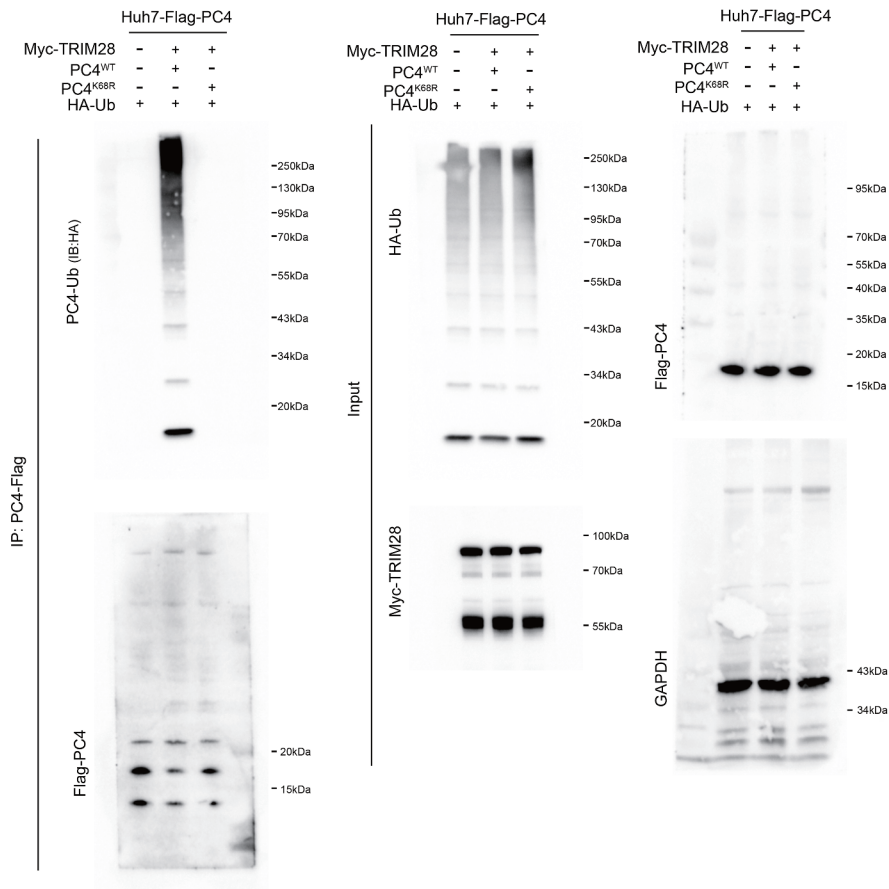

**H**

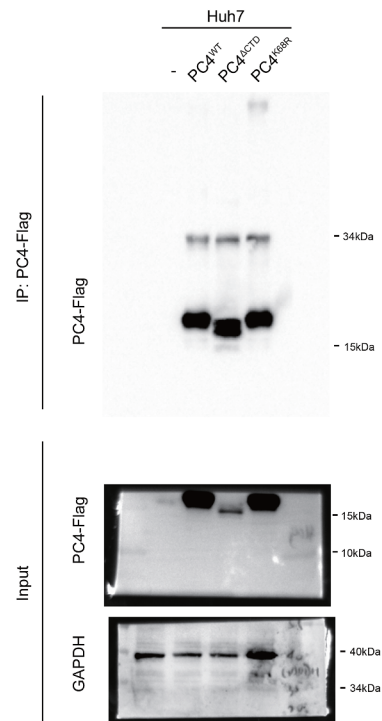

**J**

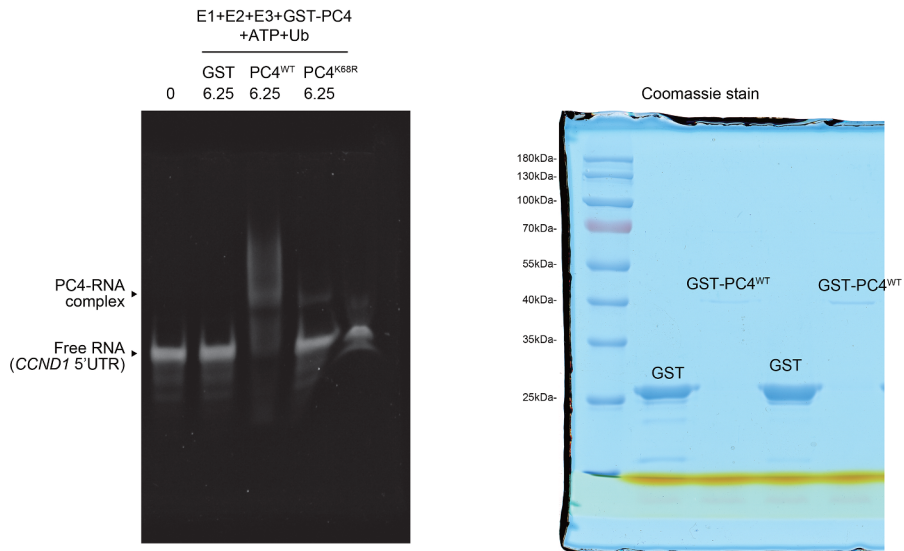

Supplement: JCB_202308066_SourceDataF3.pdf [file JCB_202308066_SourceDataF3.pdf]

**Figure 4**

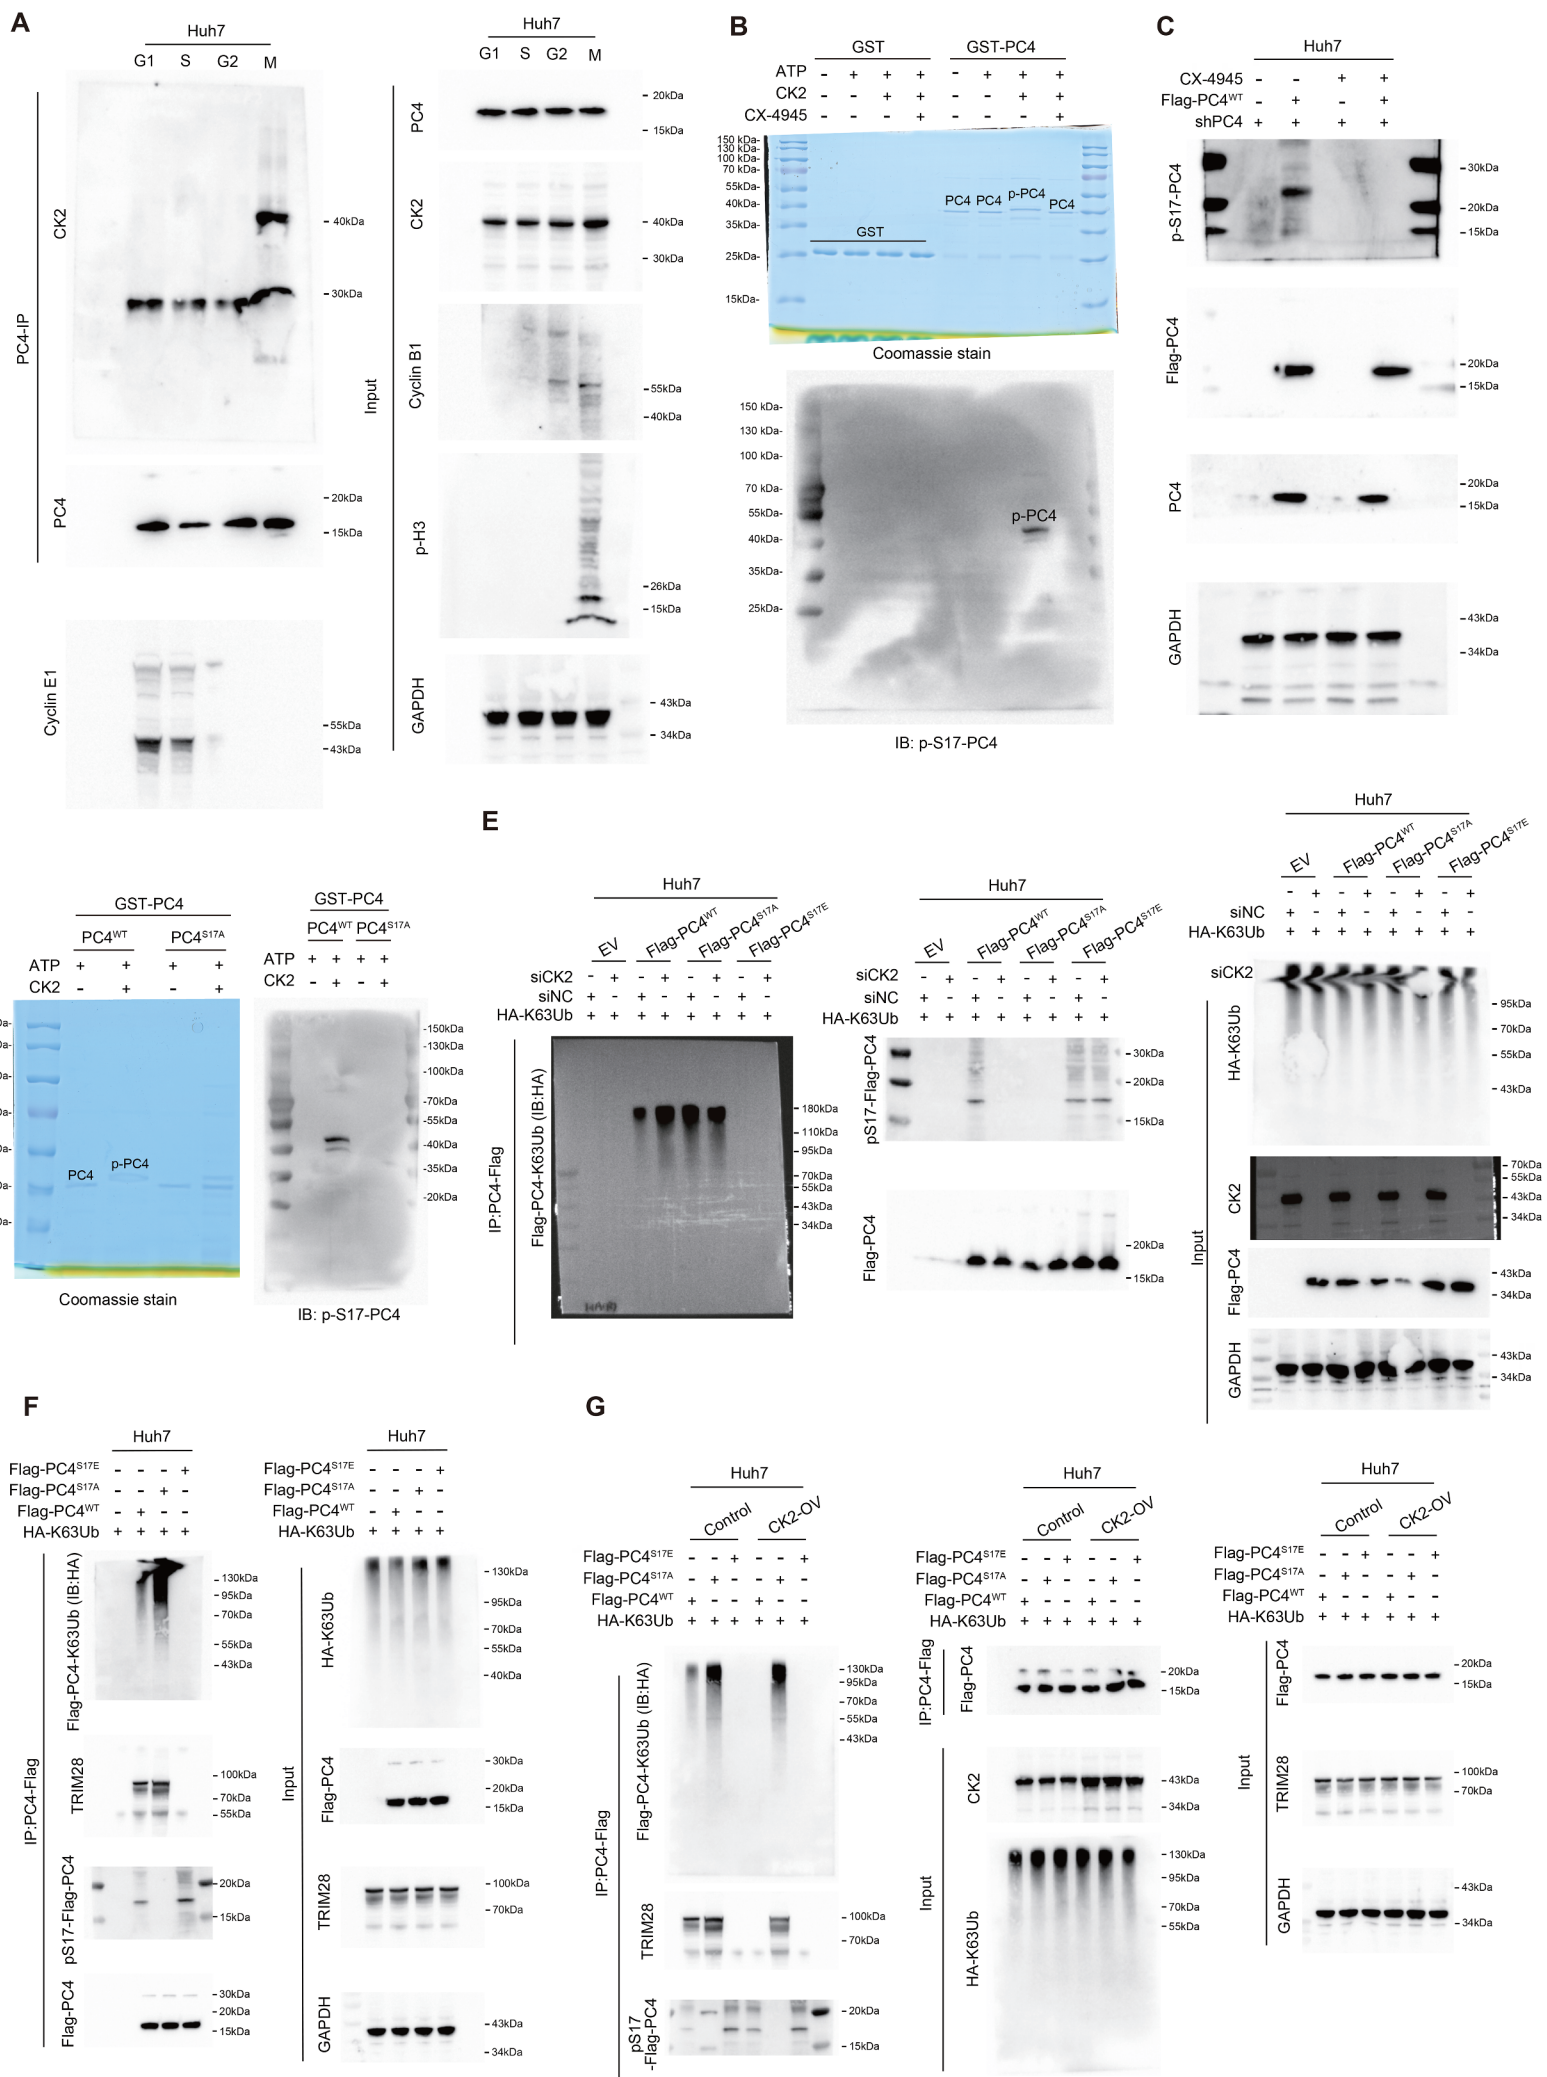

# Figure 4

## H

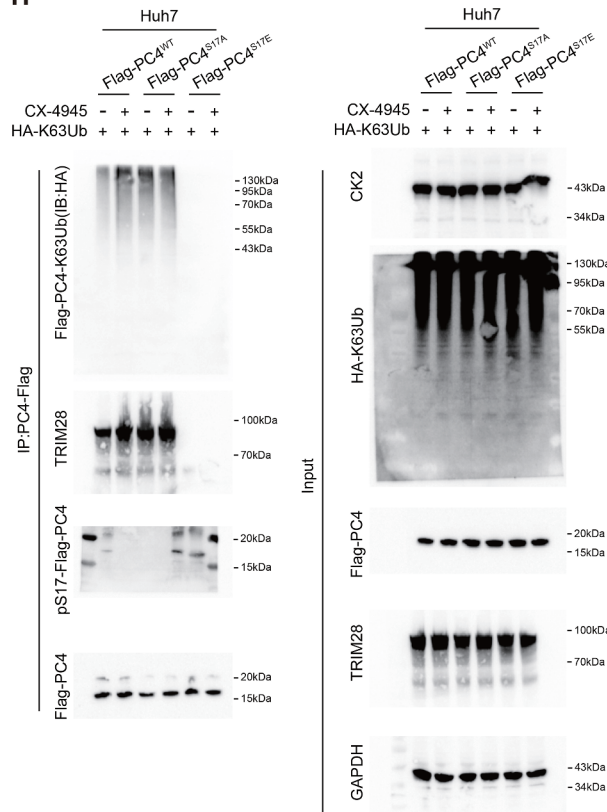

## I

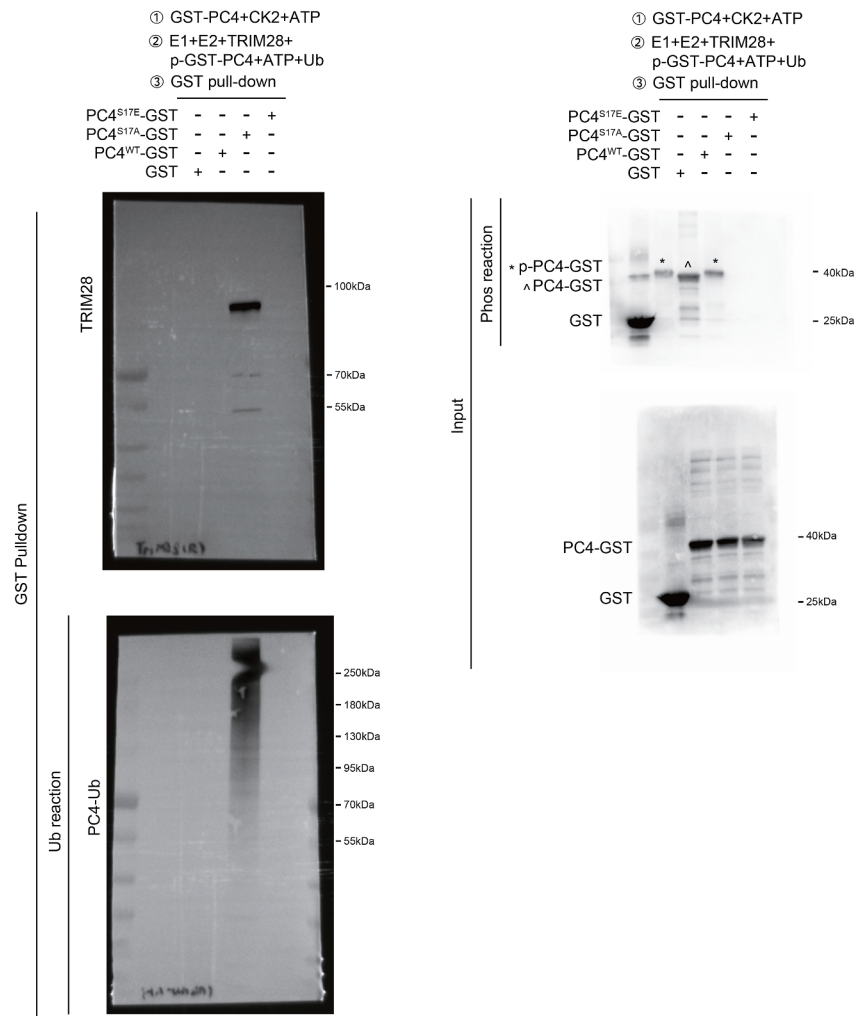

## J

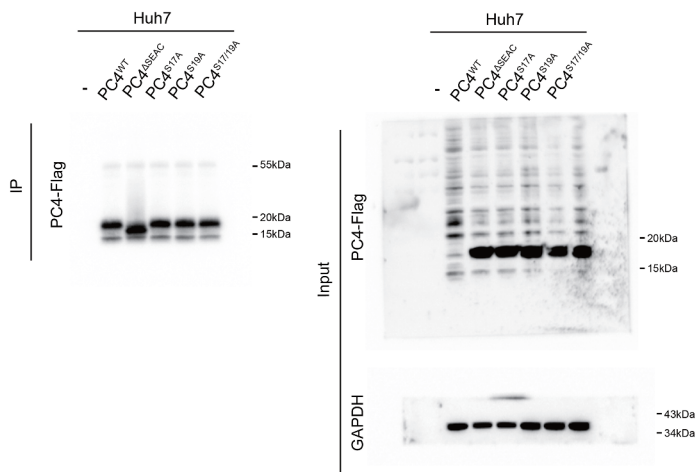

## K

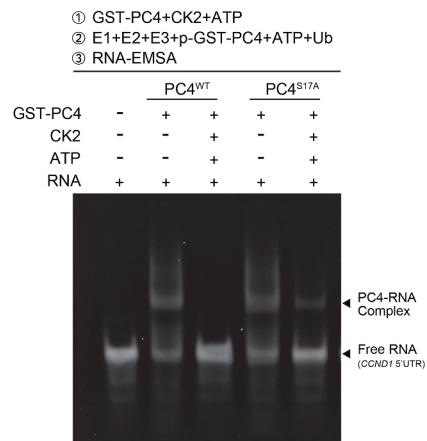

Supplement: JCB_202308066_SourceDataF4.pdf [file JCB_202308066_SourceDataF4.pdf]

# Figure 5

C

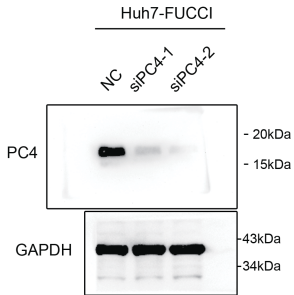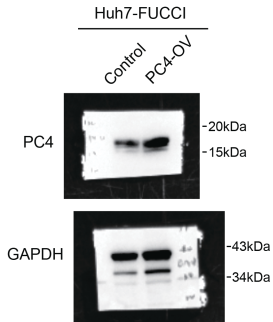

Supplement: JCB_202308066_SourceDataF5.pdf [file JCB_202308066_SourceDataF5.pdf]

# Figure 7

**A**

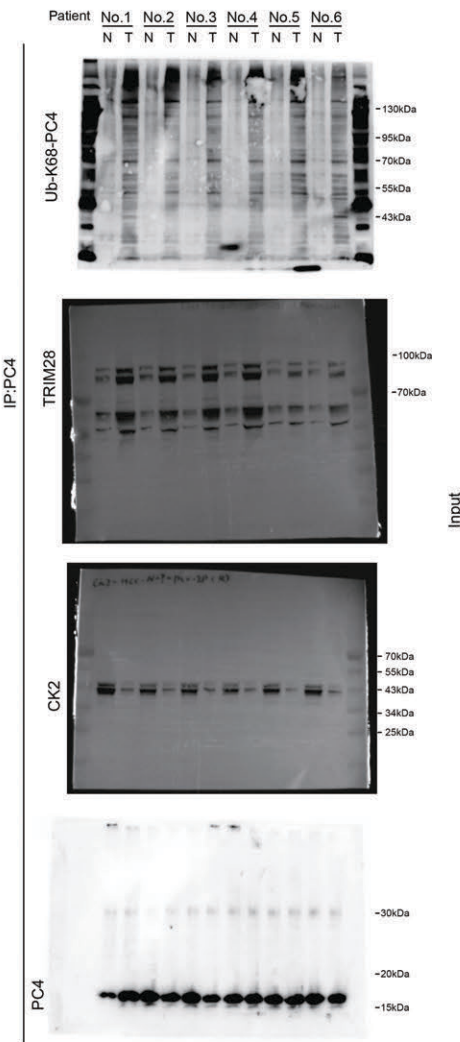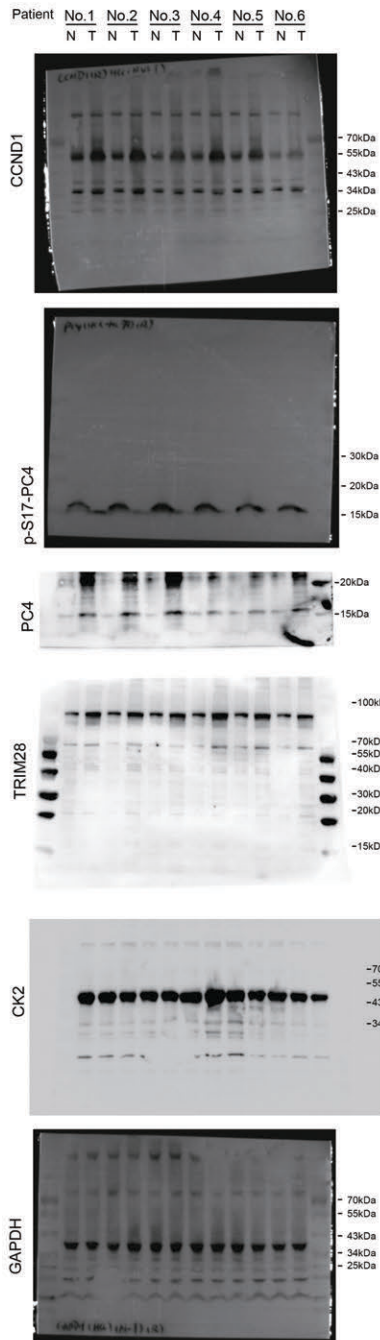

**C**

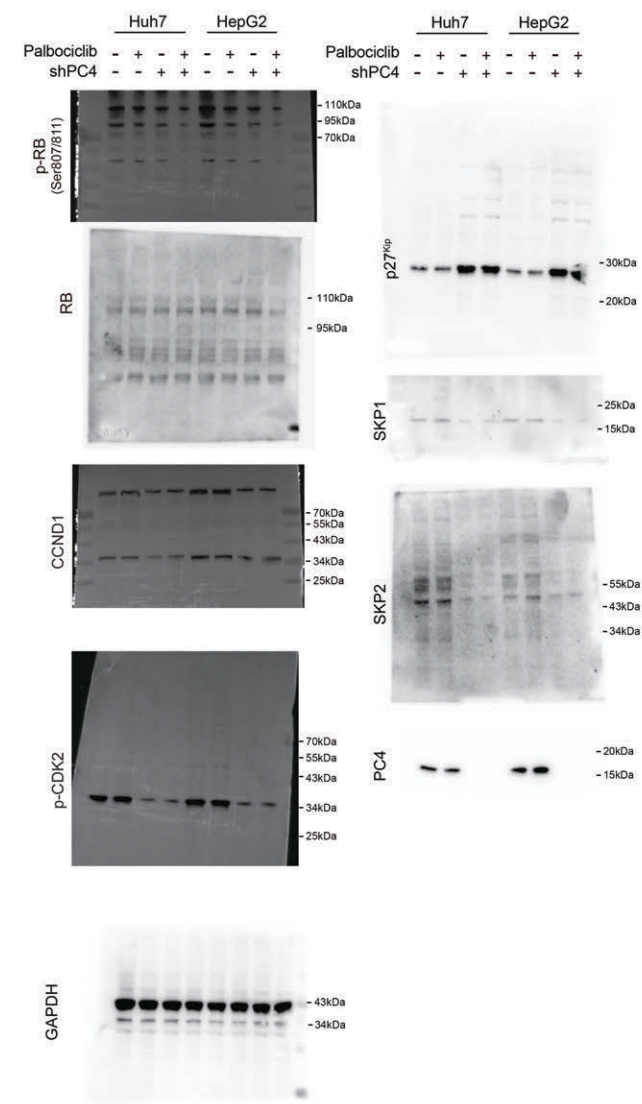

**E**

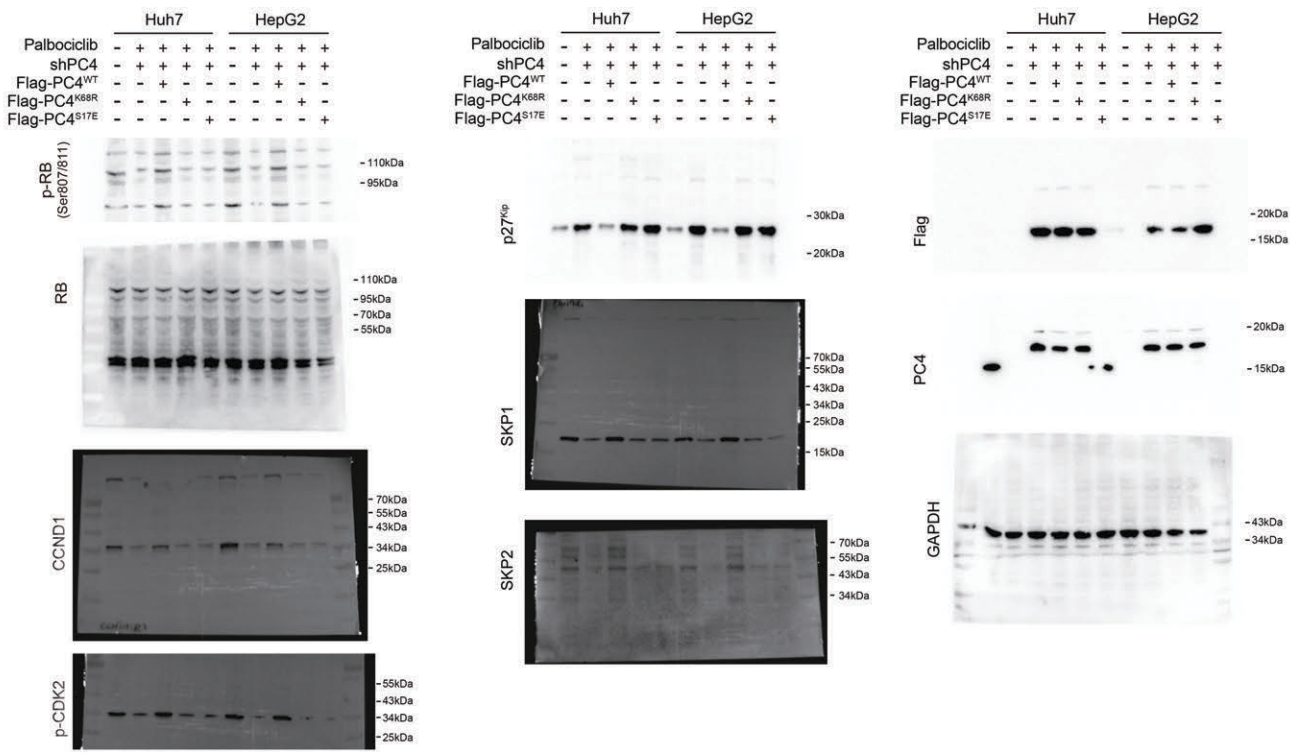

Supplement: JCB_202308066_SourceDataF7.pdf [file JCB_202308066_SourceDataF7.pdf]

# Figure S1

A

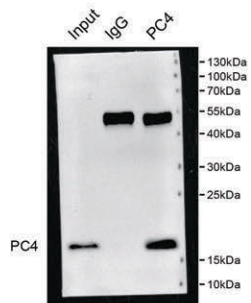

E

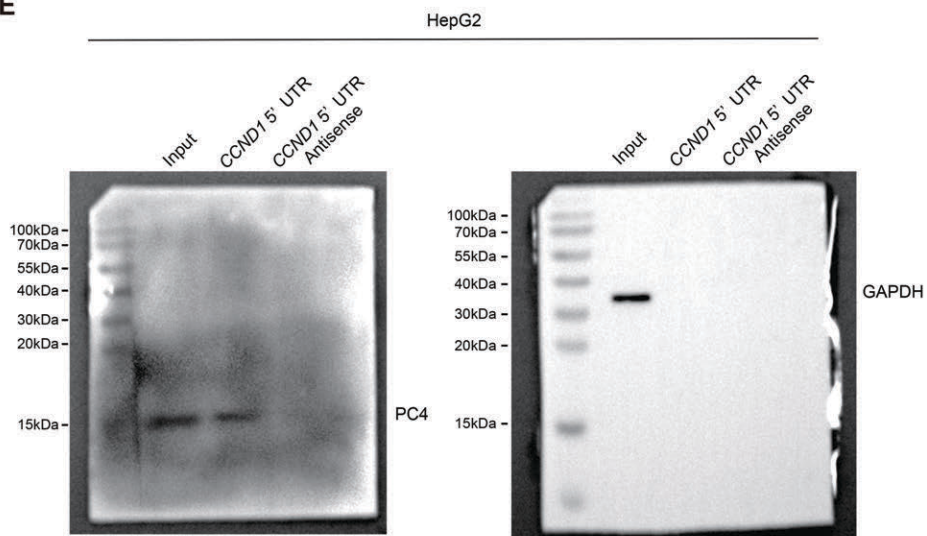

L

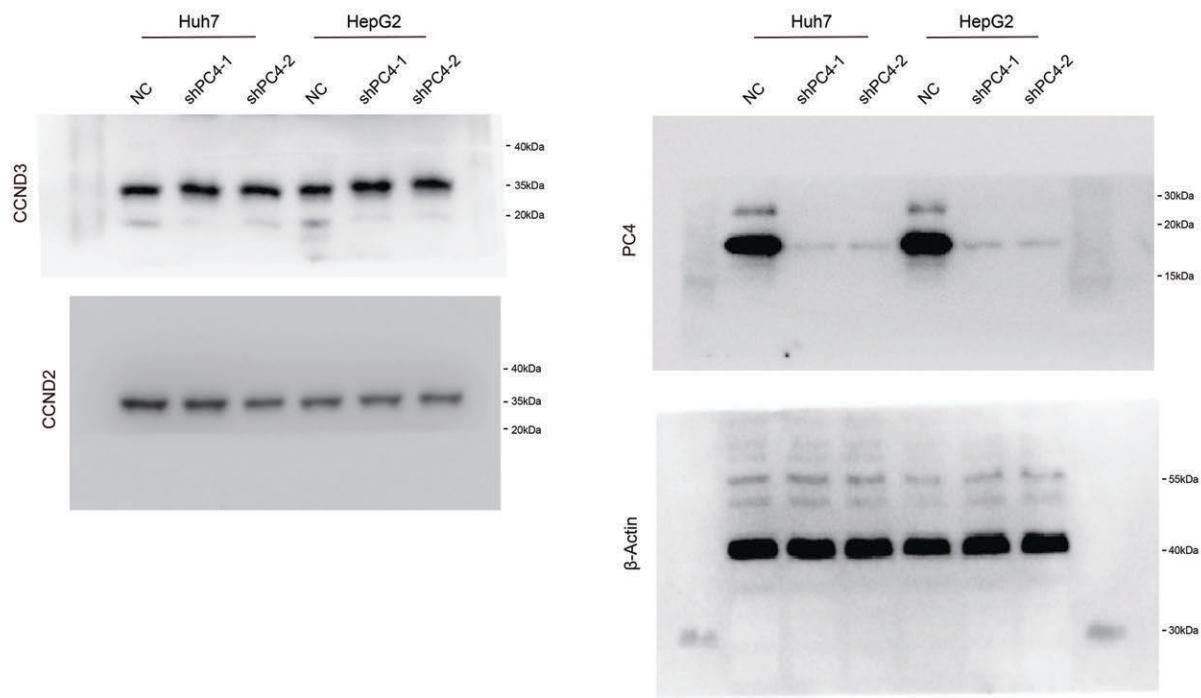

Supplement: JCB_202308066_SourceDataFS1.pdf [file JCB_202308066_SourceDataFS1.pdf]

# Figure S2

## A

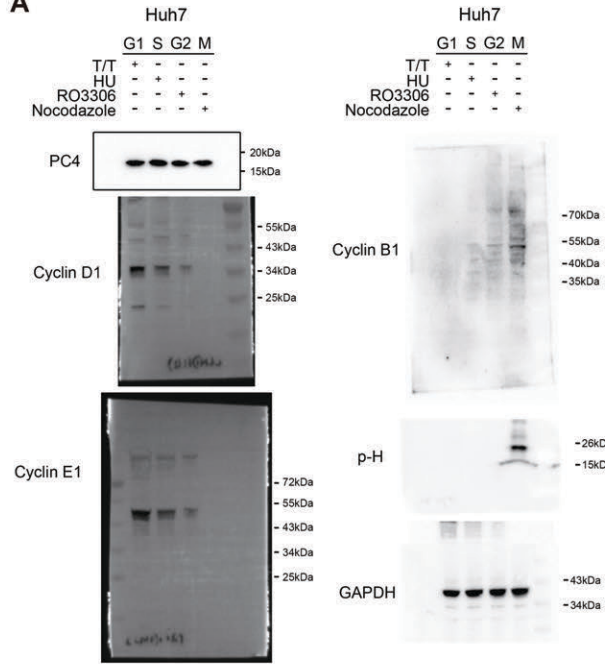

## H

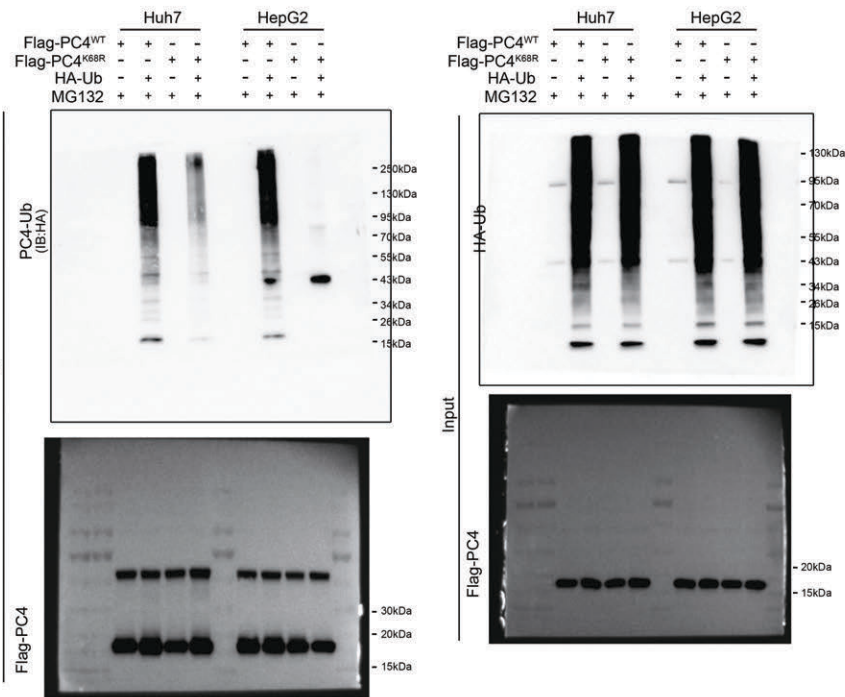

Input

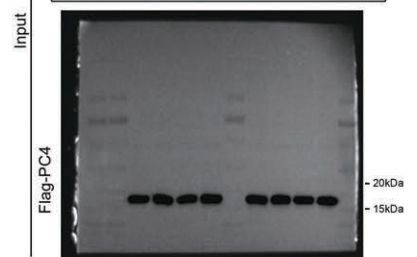

## I

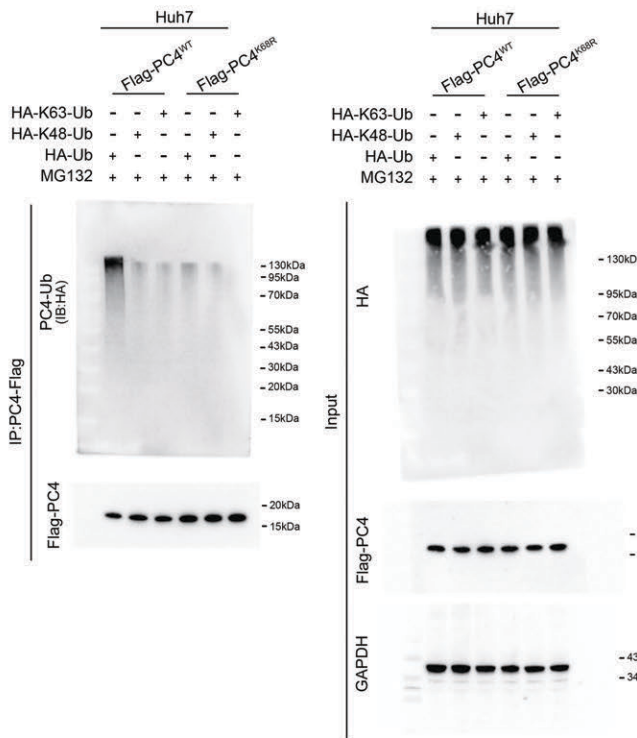

Input

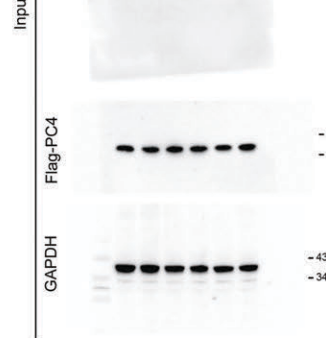

## K

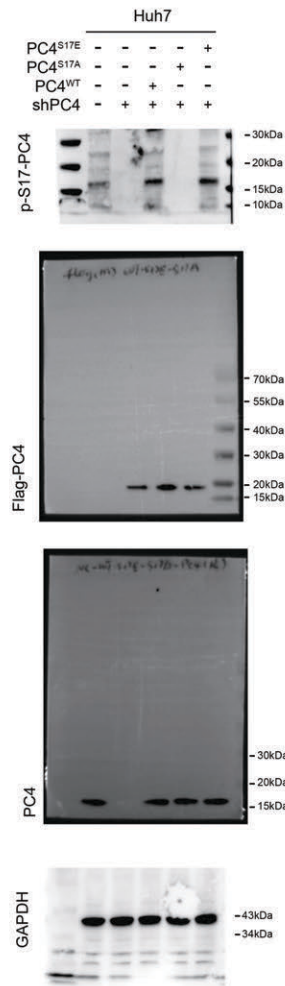

## L

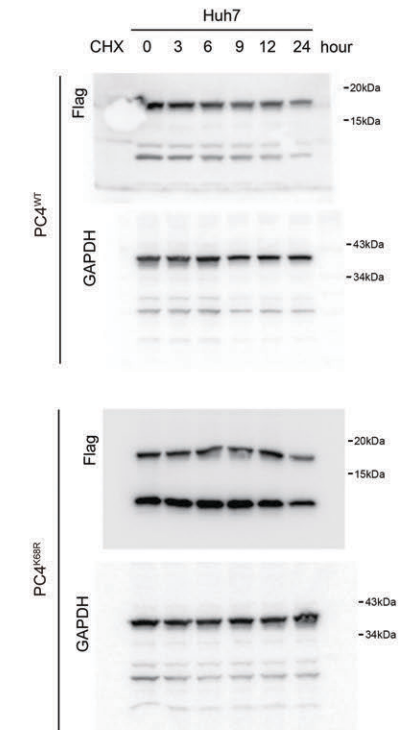

PC4<sup>WT</sup>

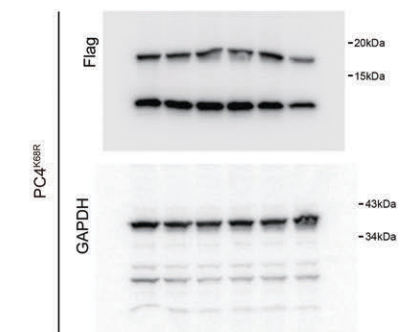

PC4<sup>K68R</sup>

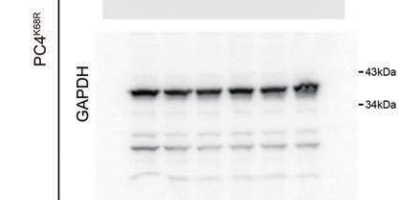

Supplement: JCB_202308066_SourceDataFS2.pdf [file JCB_202308066_SourceDataFS2.pdf]

# Figure S3

**A**

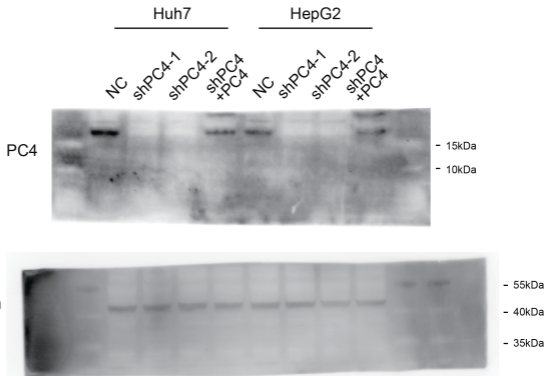

Supplement: JCB_202308066_SourceDataFS3.pdf [file JCB_202308066_SourceDataFS3.pdf]

# Figure S4

A

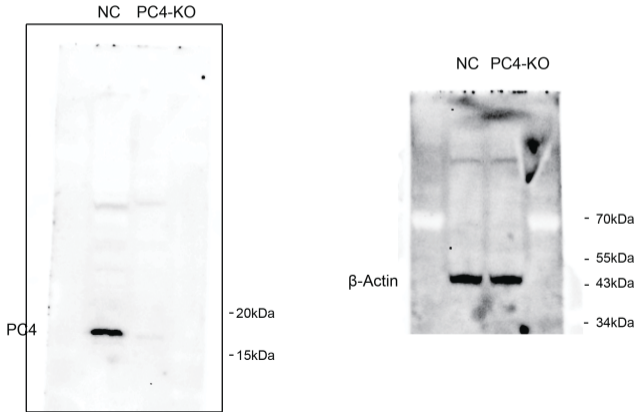

Supplement: JCB_202308066_SourceDataFS4.pdf [file JCB_202308066_SourceDataFS4.pdf]

# Figure S5

## A

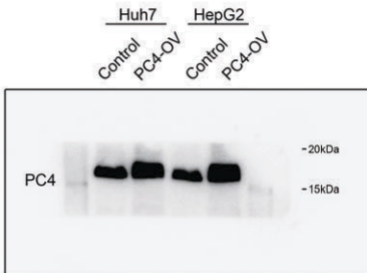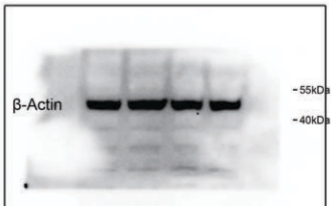

Supplement: JCB_202308066_SourceDataFS5.pdf [file JCB_202308066_SourceDataFS5.pdf]

# Figure S6

**A**

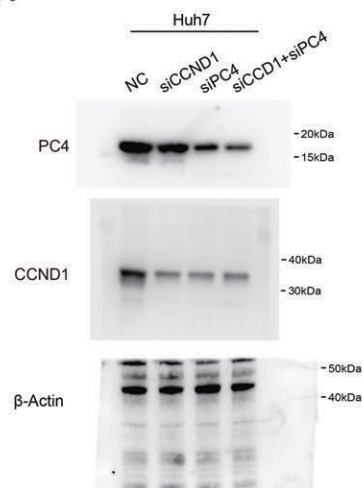

**B**

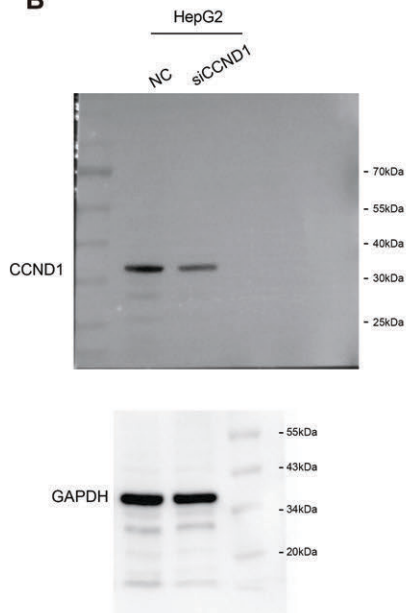

**D**

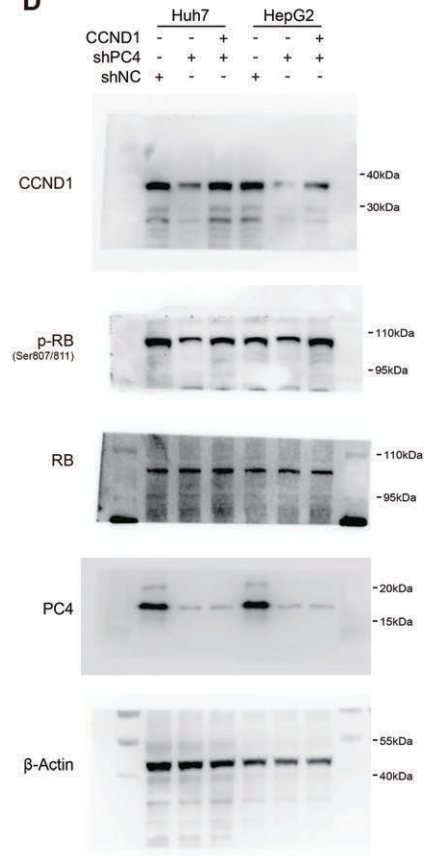

**H**

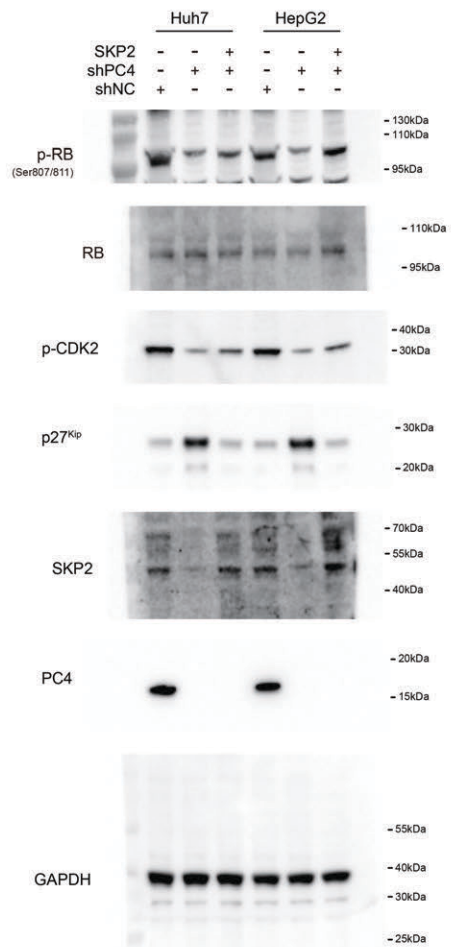

Supplement: JCB_202308066_SourceDataFS6.pdf [file JCB_202308066_SourceDataFS6.pdf]

# Figure S7

**A**

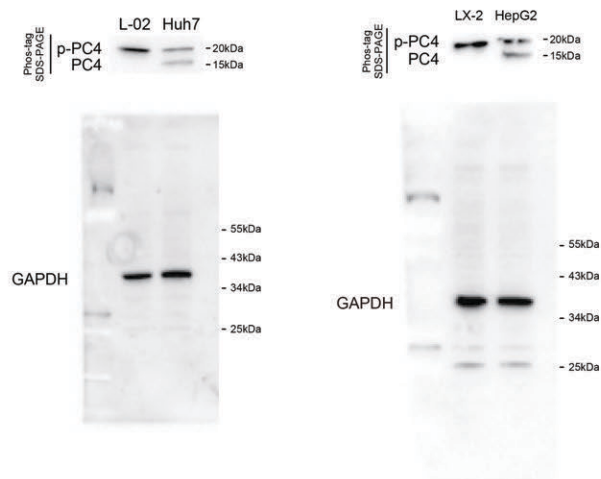

**B**

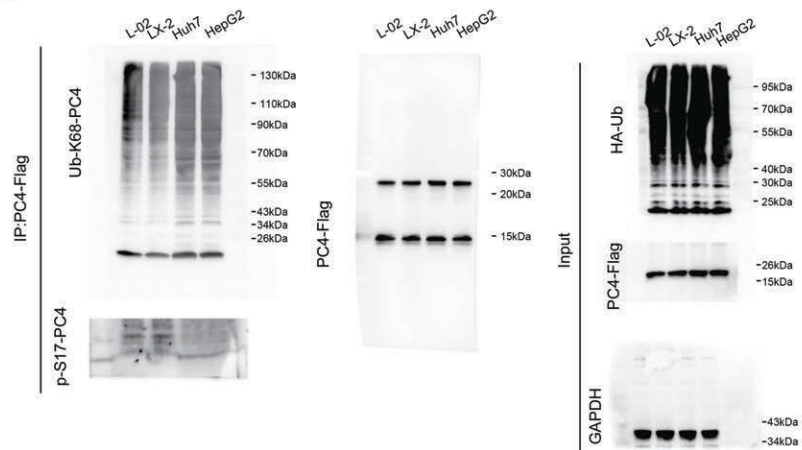

**H**

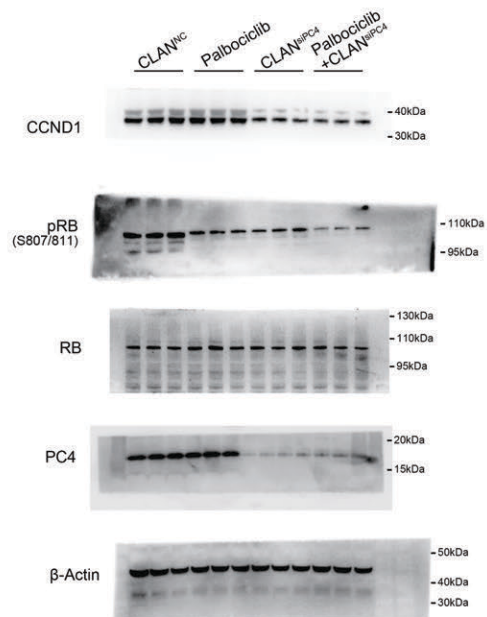

Supplement: JCB_202308066_SourceDataFS7.pdf [file JCB_202308066_SourceDataFS7.pdf]
